# Supplementary material for: RNA chain length and stoichiometry govern surface tension and stability of protein-RNA condensates
Source: PubMed Central journal article supplement — iScience. 2022 Mar 18;25(4):104105. doi: 10.1016/j.isci.2022.104105 (PMC8976129; doi:10.1016/j.isci.2022.104105), 2022-03-18
Supplement: mmc1.pdf [file mmc1.pdf]

iScience, Volume 25

## **Supplemental information**

### **RNA chain length and stoichiometry govern surface tension and stability of protein-RNA condensates**

**Rabia Laghmach, Ibraheem Alshareedah, Matthew Pham, Muralikrishna Raju, Priya R. Banerjee, and Davit A. Potoyan**

## Supplementary information

| Energy Term                                                                                                                 | Parameter Values                                                                       | Meaning                                                                                   |
|-----------------------------------------------------------------------------------------------------------------------------|----------------------------------------------------------------------------------------|-------------------------------------------------------------------------------------------|
| $k_b^P (r - r_0^P)^2$                                                                                                       | $r_0^P = 0.38, k_b^P = 10$                                                             | Protein chain bonding                                                                     |
| $k_b^R (r - r_0^R)^2$                                                                                                       | $r_0^R = 0.34, k_b^P = 10$                                                             | RNA chain bonding                                                                         |
| $k_\theta^R (\theta - \theta_0)^2$                                                                                          | $\theta_0 = 1.34, k_\theta^R = 1$                                                      | RNA chain stiffness                                                                       |
| $\frac{q_i q_j}{4\pi D r} \exp(-\kappa r)$                                                                                  | $D = 80, k = [1, \dots, 3]$                                                            | Electrostatic interactions                                                                |
| $\epsilon_{ij} \left[ \left( \frac{\sigma_{ij}}{r_{ij}} \right)^{12} - \left( \frac{\sigma_{ij}}{r_{ij}} \right)^6 \right]$ | $\epsilon_{ij} = 1$ Values of $\sigma_{ij}$ come from Dignon et al. Plos Comp Bio 2018 | Short-range attraction and excluded volume terms acting between all RNA and protein units |

**Table S1: Listing of all energy terms describing interactions of coarse-grained molecular models of RNA and RGG along with parameters and their physical meaning; Related to the main figure 1.**

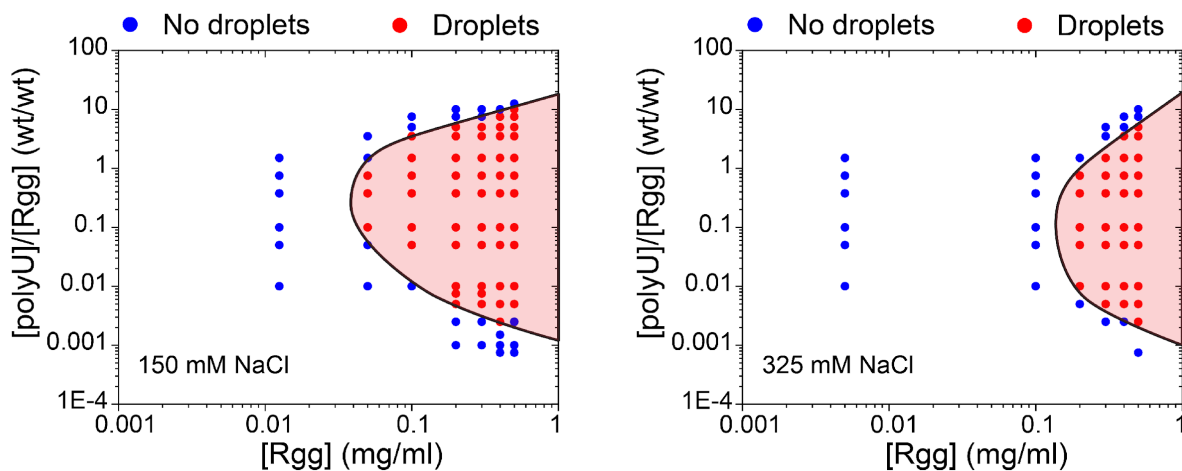

**Figure S1. Experimental state diagrams of RGG-PolyU mixtures; Related to the main figure 6.** Shown are phase diagrams at 150 mM NaCl (left) and 325 mM NaCl (right). Blue-filled circles indicate a homogenous mixed state. Red-filled circles indicate LLPS. The solid black line is drawn as a guide to the eye. Samples were prepared at the desired RGG and PolyU concentration in a buffer containing 25 mM Tris-HCl (pH 7.5), 20 mM DTT, and the indicated salt concentration.

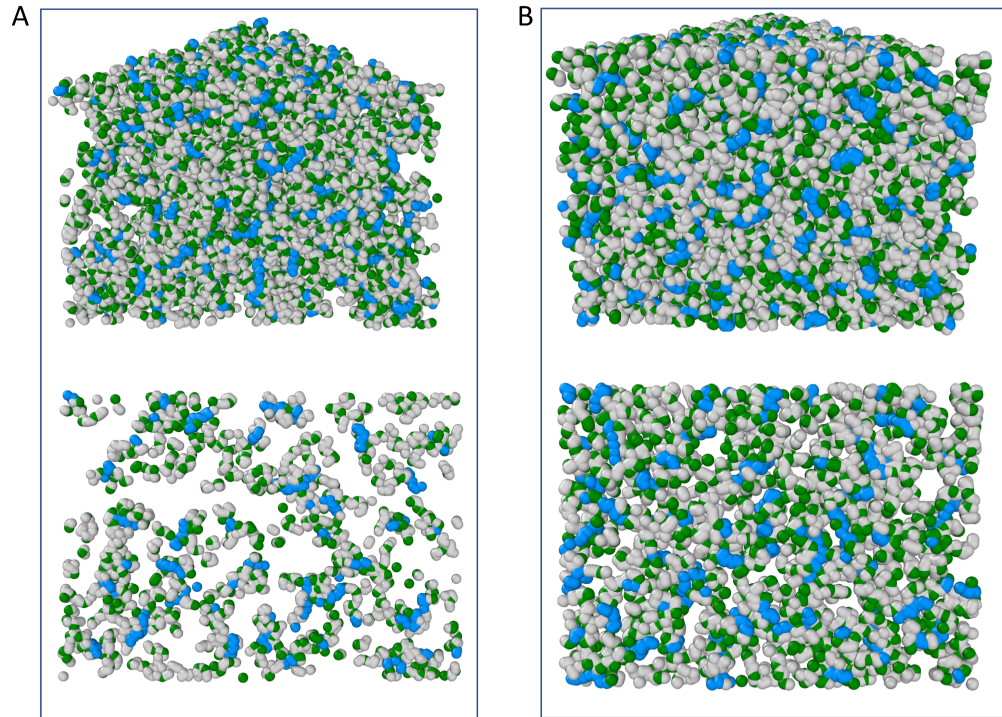

**Figure S2. Snapshots of simulations done under NPT ensemble; Related to the main figure 4.** Showing snapshots of NPT simulations with (A)  $P=1$  and (B)  $P=10$  conditions demonstrate the potential changes in condensate density that may occur as a function of external crowding. Each panel shows a slice which is taken across the diagonal of a simulation box (top) and a 2nm slab is taken from a simulation box to better show the difference in packing of chains (bottom)

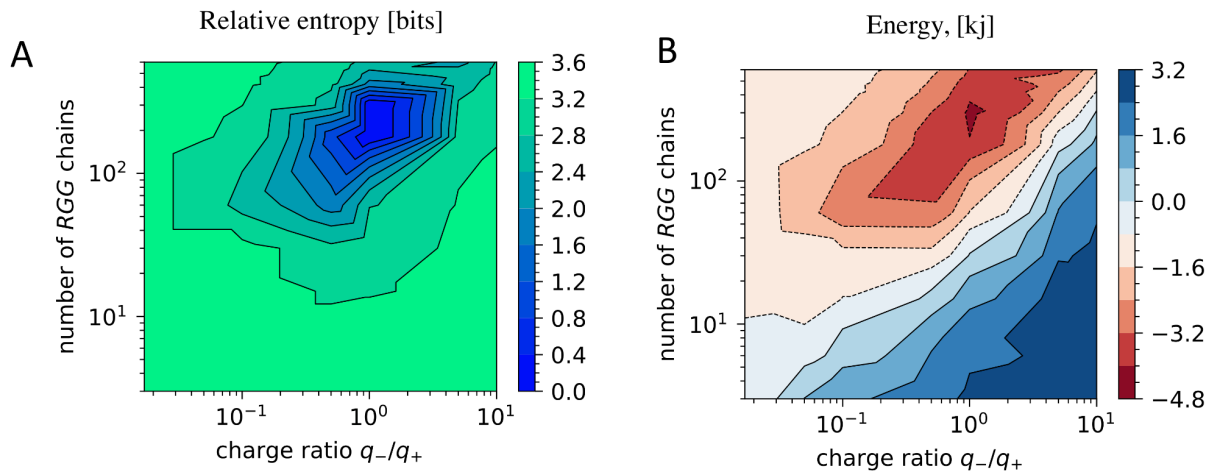

**Figure S3. Relative entropy and energies of condensation; Related to the main figure 5 (A)** Shannon entropy measure computed by image segmentation of simulation snapshots. Entropy is

measured relative to uniformly dissolved state (B) Average inter-molecular energy accounting for excluded volume, dispersion, and electrostatic forces.
